# Supplementary material for: Apple-like Shape of Freezing Paraffin Wax Droplets and Its Origin
Source: MDPI journal article supplement (doi:10.3390/ma16165514), 2023-08-08
Supplement: s1 [file s1]

## Supplementary Materials

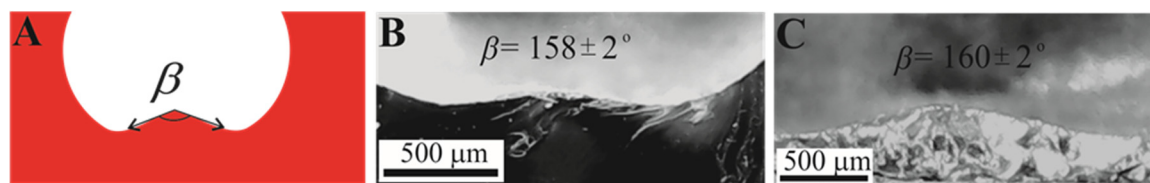

**Figure S1.** Opening angle. Images of the opening dimple angle (A) schematic, (B) replica taken from 10  $\mu\text{l}$  paraffin wax droplet, (C) replica taken from 50  $\mu\text{l}$  droplet.

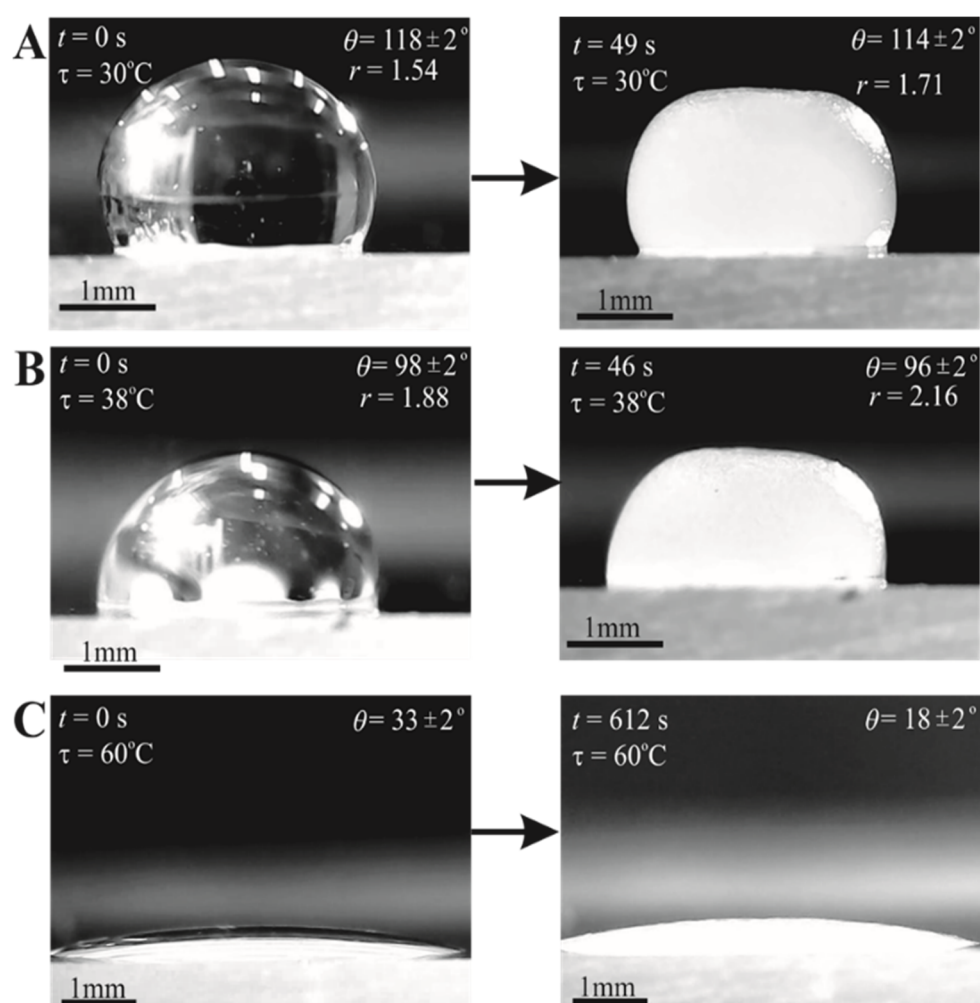

**Figure S2.** Effect of substrate temperature on molten wax wetting behavior. Images of 10  $\mu\text{l}$  paraffin wax droplets placed on a slide at different temperatures: (A) 30 °C, (B) 38 °C, (C) 60 °C.

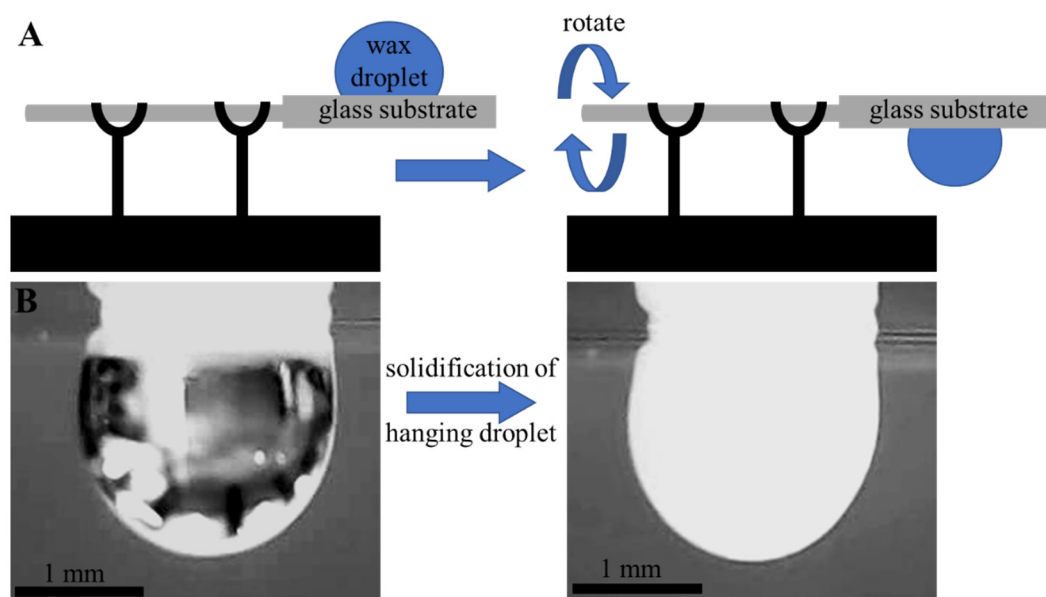

**Figure S3.** Effect of gravity on droplet freezing. (A) Schematic representation of the experimental setup. (B) Images of a 10  $\mu$ l paraffin wax droplet before and after solidification hanging from a glass substrate at  $\tau_{sub}=22$  °C.

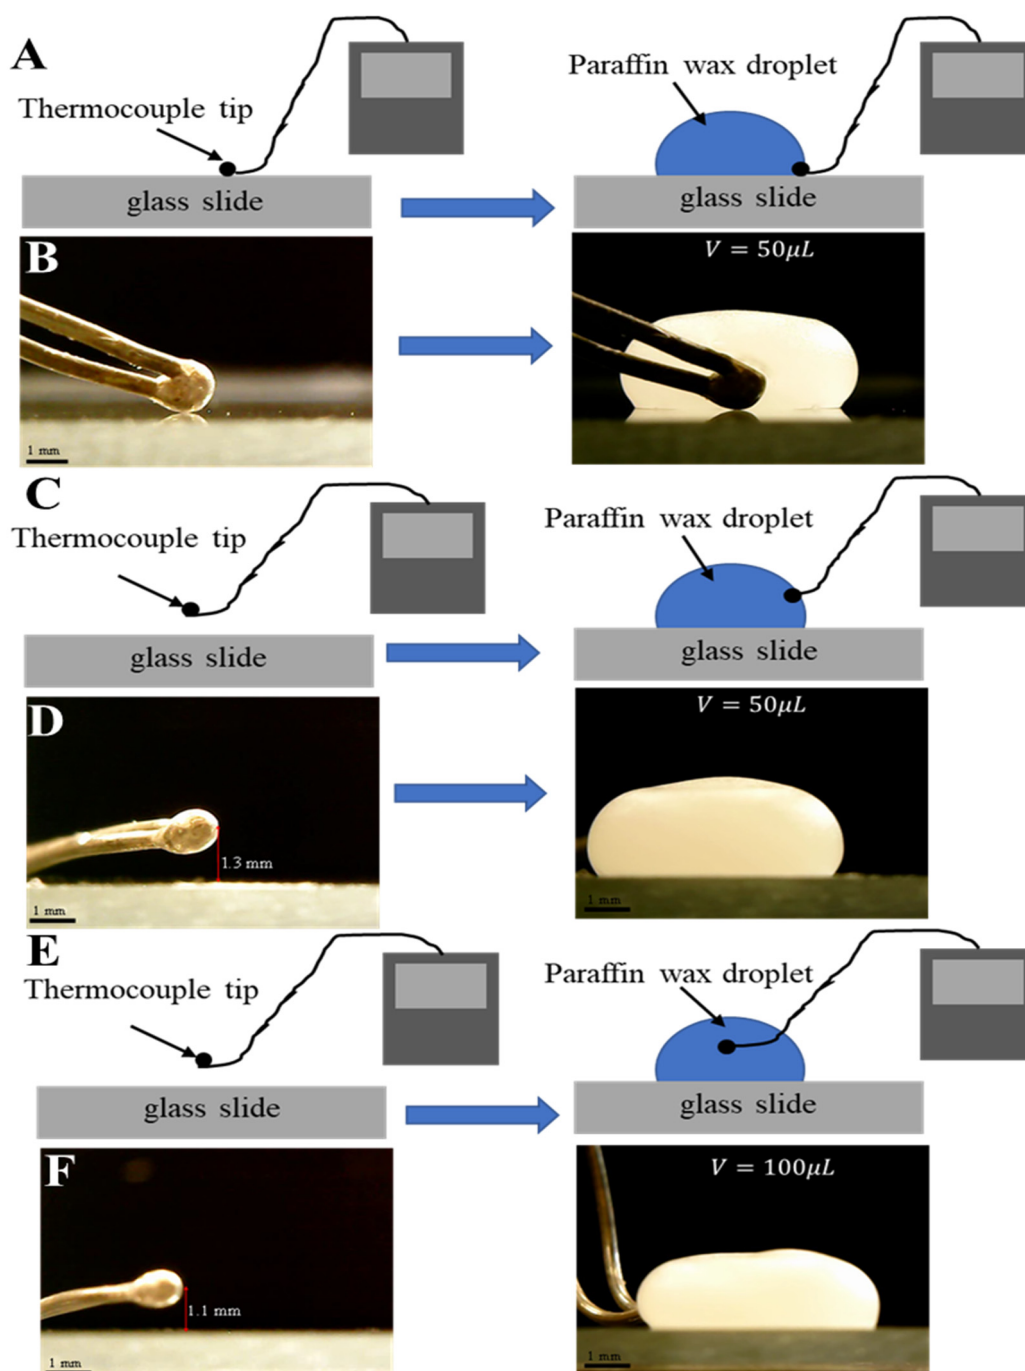

**Figure S4.** Thermocouple measurements of the droplet surface temperature. Schematic (A) and image (B) represent the thermocouple tip placed at the three-phase contact line (air/glass/paraffin). Schematic (C) and image (D) represent the thermocouple tip at the air/paraffin interface. Schematic (E) and image (F) show that the thermocouple tip is surrounded by paraffin wax (near the center of the droplet).

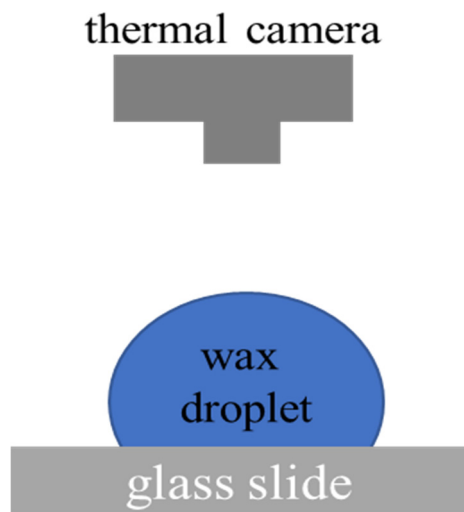

*Figure S5. Schematics of pyrometric temperature measurements.*

#### Supplementary Files

- **Video S1.** Side view of a deforming and solidifying 10  $\mu\text{l}$  paraffin wax droplet.
- **Video S2.** Side view of a deforming and solidifying 20  $\mu\text{l}$  paraffin wax droplet.
- **Video S3.** Side view of a deforming and solidifying 50  $\mu\text{l}$  paraffin wax droplet.
- **Video S4.** Side view of a deforming and solidifying 10  $\mu\text{l}$  paraffin wax droplet hanging upside down from a glass substrate.
- **Video S5.** Time variation of infrared image of the paraffin wax droplet. 50  $\mu\text{l}$  droplet, view from above, speed 7X.
