# Supplementary material for: Apple-like Shape of Freezing Paraffin Wax Droplets and Its Origin
Source: Materials (Basel). 2023 Aug 8;16(16):5514. doi: 10.3390/ma16165514 (PMC10456291; doi:10.3390/ma16165514)
Supplement: Supplementary file 1 [file materials-16-05514-s001.zip]

Archive with 6 entries (6 files):
- Supplementary Materials.pdf
- Video S1.avi
- Video S2.avi
- Video S3.avi
- Video S4.avi
- Video S5.avi
